# Supplementary material
Source: Springer Nature journal article supplement (https://www.springermedizin.de/resource/supplementary/13046_2011_499_MOESM3_ESM.pdf/9662366)

Log<sub>2</sub> Foxp3

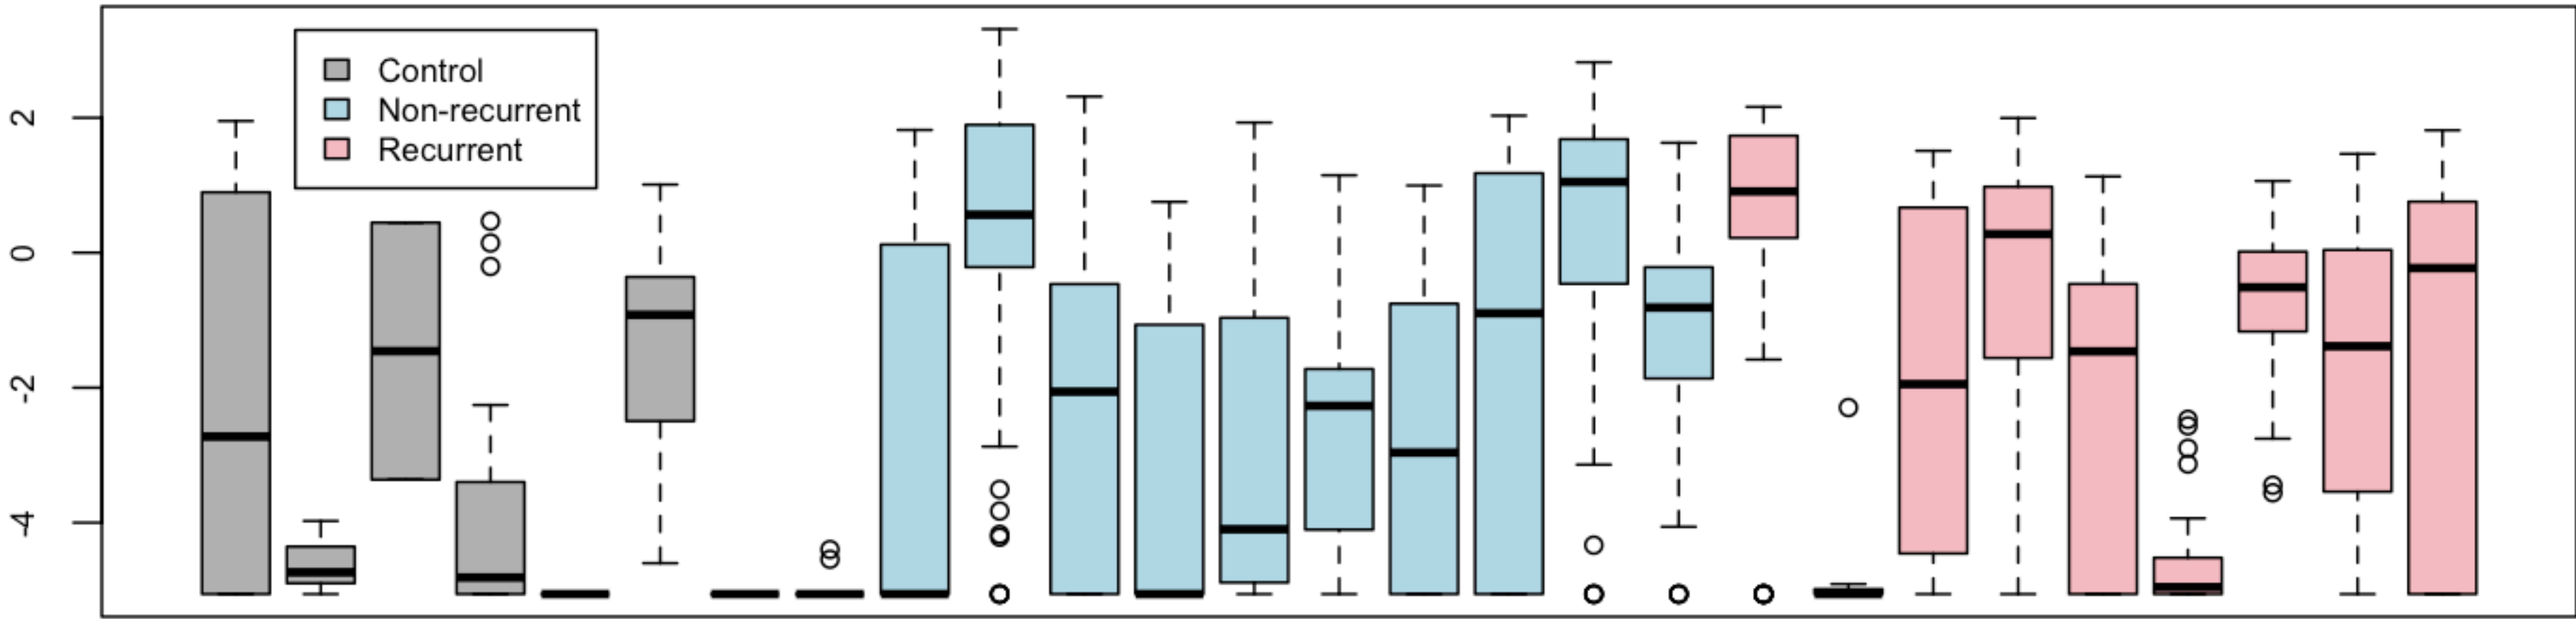

Supplement: MOESM3 [file 9662366]
